# Supplementary material for: Al-coordination polymer-derived nanoporous nitrogen-doped carbon microfibers as metal-free catalysts for oxygen electroreduction and acetalization reactions
Source: Royal Society of Chemistry journal article supplement (doi:10.1039/c5ta05605e), 2015-01-01
Supplement: c5ta05605e1.pdf [file c5ta05605e1.pdf]

**Al-coordination polymers-derived nanoporous nitrogen-doped  
carbon microfibers as metal-free catalysts for oxygen  
electroreduction and acetalization reaction**

*Zhen Han<sup>a,b</sup>, Youyi Yu<sup>a</sup>, Yongbo Zhang<sup>a</sup>, Bing Dong<sup>a</sup>, Aiguo Kong<sup>\*a</sup> and Yongkui Shan<sup>\*a</sup>*

*a, School of Chemistry and Molecular Engineering, East China Normal University, 500  
Dongchuan Road, Shanghai 200241, P.R. China.*

*b, Shanghai Key Laboratory of Molecular Catalysts and Innovative Materials,  
Fudan University, Shanghai 200433, P.R. China.*

## Supporting information

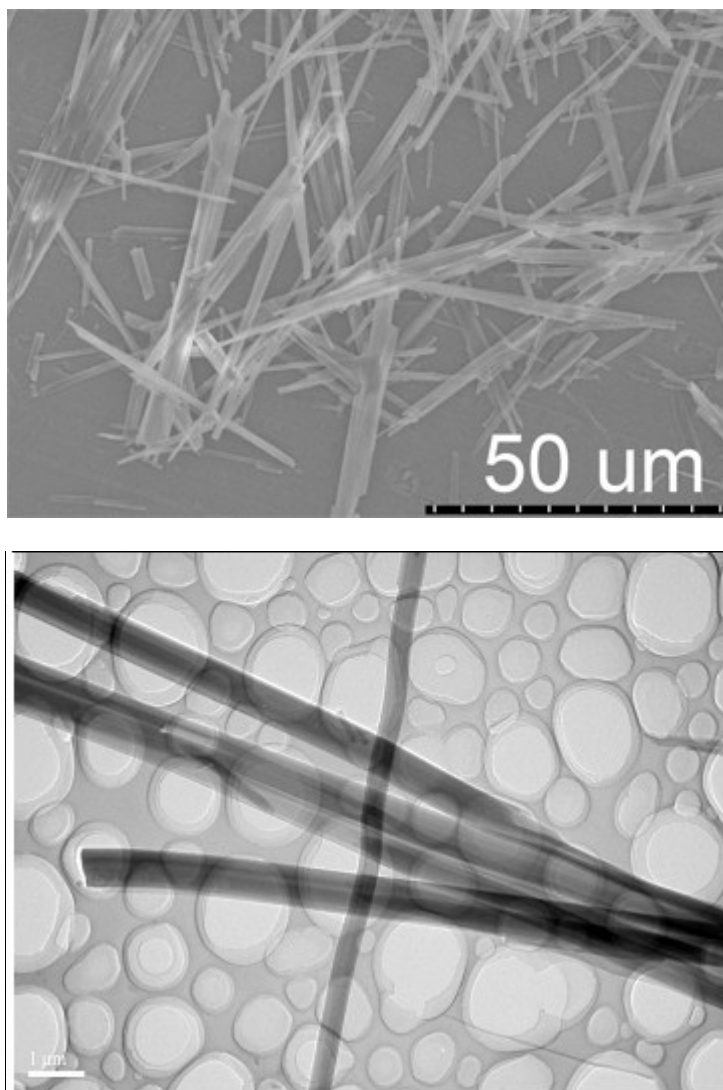

Figure S1 SEM and TEM images of Al-DTPA microfibers (80°C, DTPA and  $\text{Al}(\text{NO}_3)_3 \cdot 9\text{H}_2\text{O}$  is 1:1)

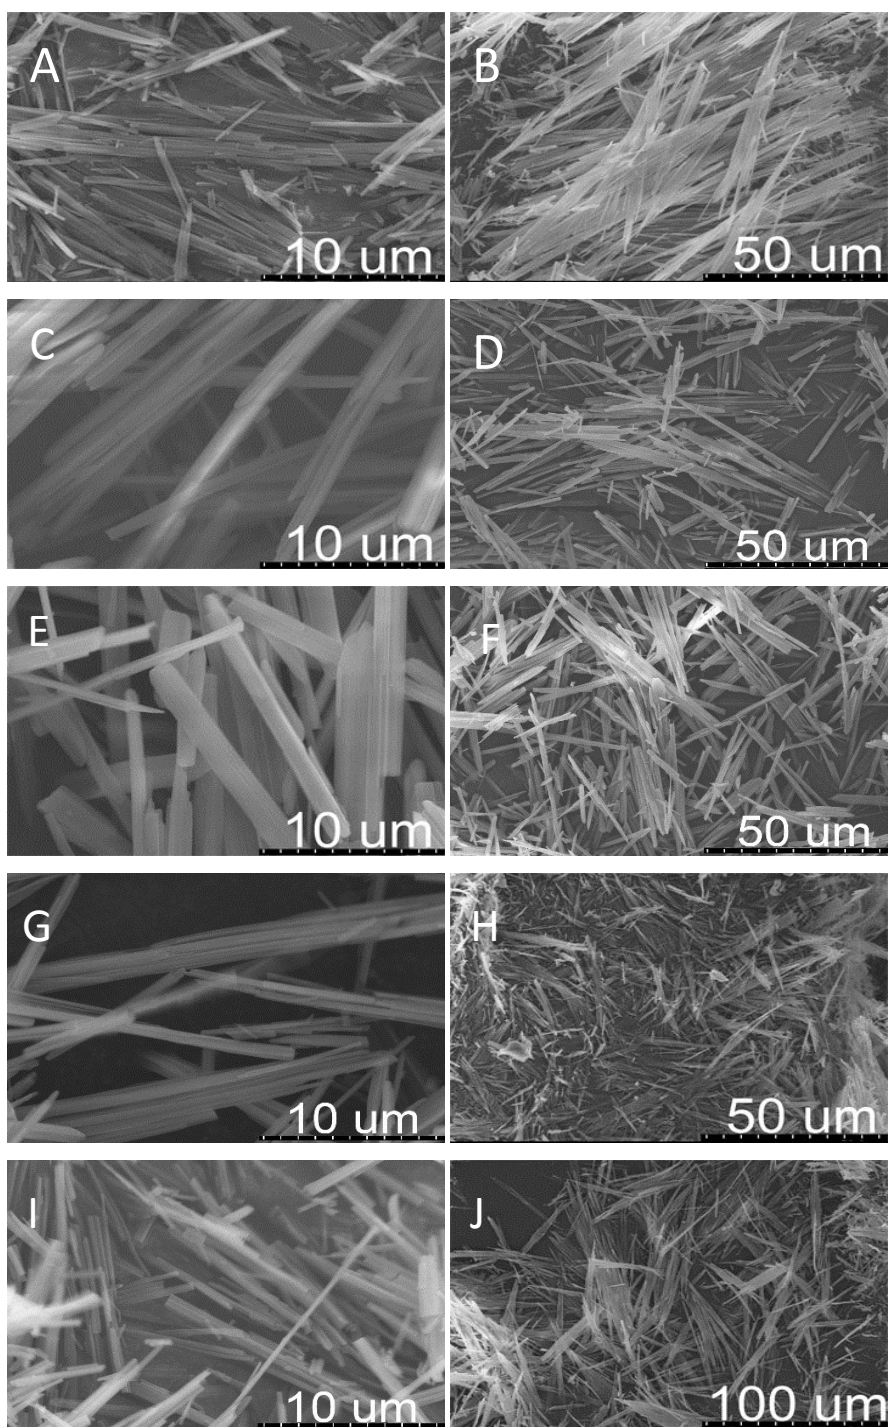

Figure S2 SEM images of Al-DTPA microfibers prepared at 60 (A and B), 80 (C and D) and 100 °C (E-F), respectively (the molar ratio of DTPA to  $\text{Al}(\text{NO}_3)_3 \cdot 9\text{H}_2\text{O}$  is 1:1); SEM images of Al-DTPA microfibers prepared at 60 °C with different molar ratios of DTPA to  $\text{Al}(\text{NO}_3)_3 \cdot 9\text{H}_2\text{O}$  ( 1:2, G and H; 2:1, I and J)

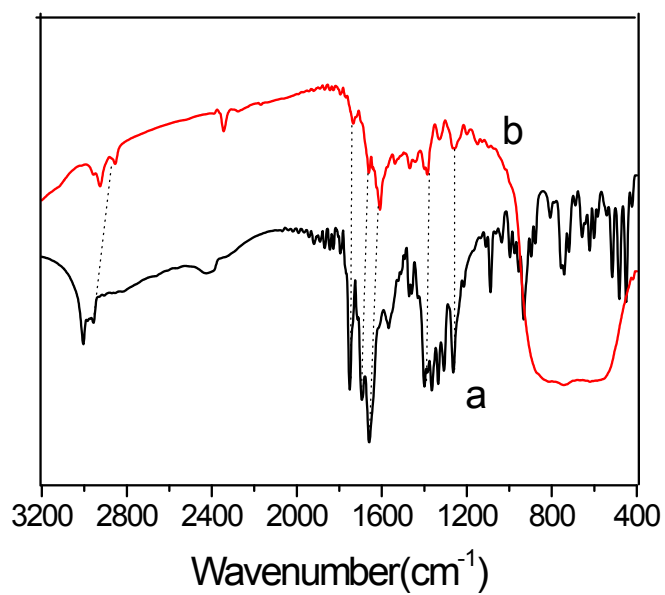

Figure S3 FT-IR spectra for DTPA (a) and Al-DTPA (b)

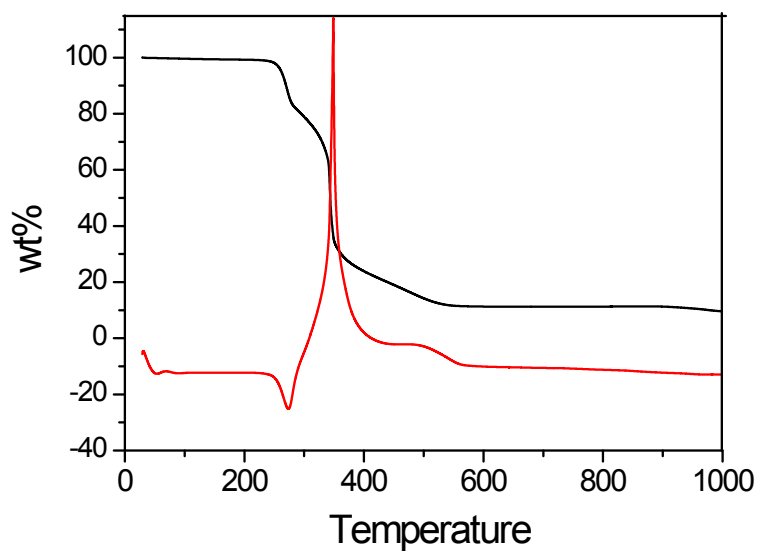

Figure S4 TG-DTA analysis for Al-DTPA microfiber in air

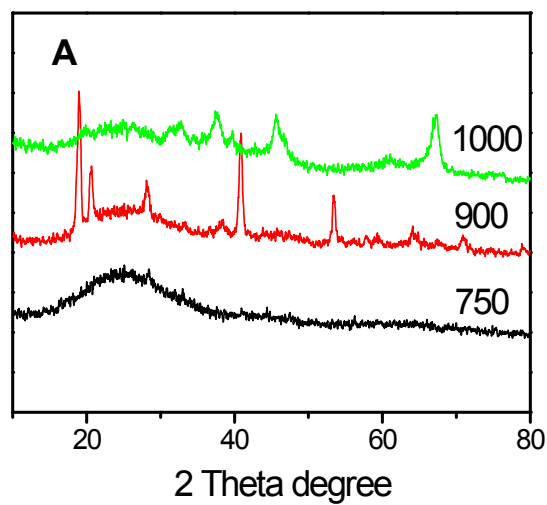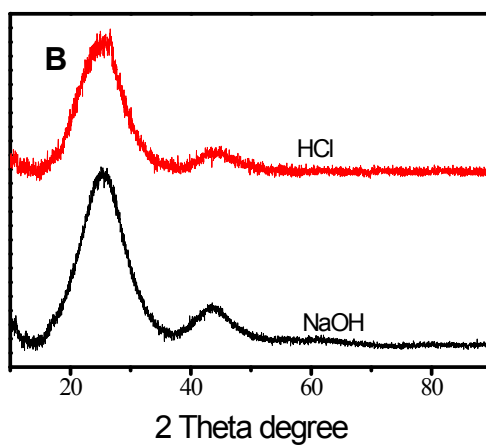

Figure S5 XRD patterns of the aluminium hydroxides or oxides-embedded carbon microfibers samples obtained by heating Al-DTPA at different temperatures (A). The NCF-900 obtained by etching off  $\text{Al}_2\text{O}_3$  or  $\text{Al}(\text{OH})_3$  materials with an aqueous solution of HCl and NaOH (10 wt%)(B).

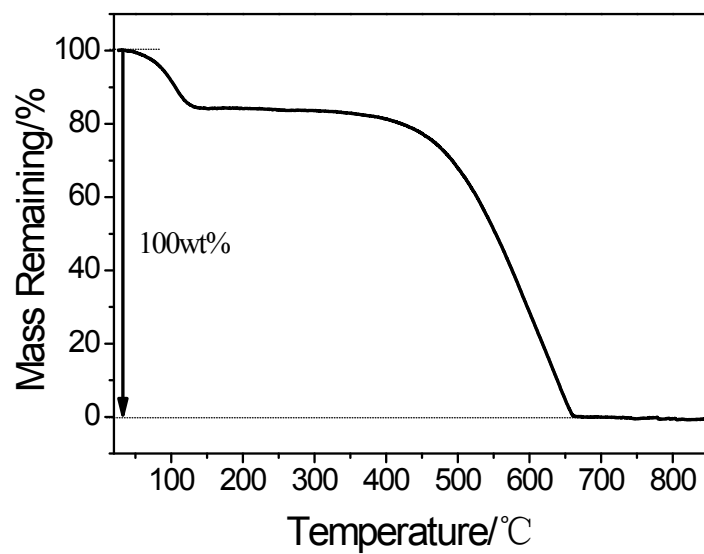

Figure S6 TGA analysis for NCF-900 in air

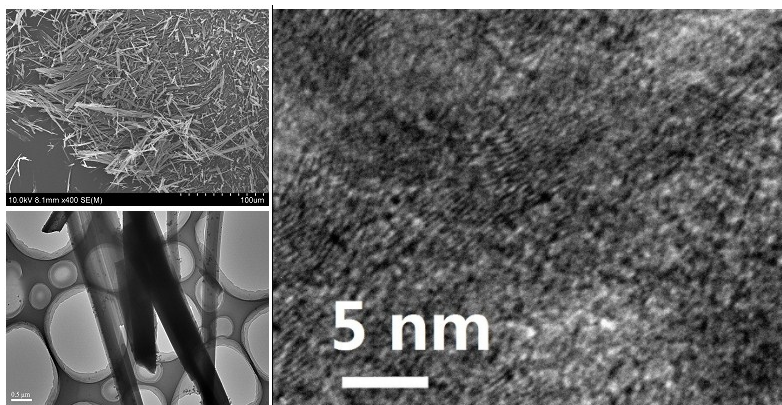

Figure S7 SEM, TEM and HRTEM images of NCFs obtained at 900 °C

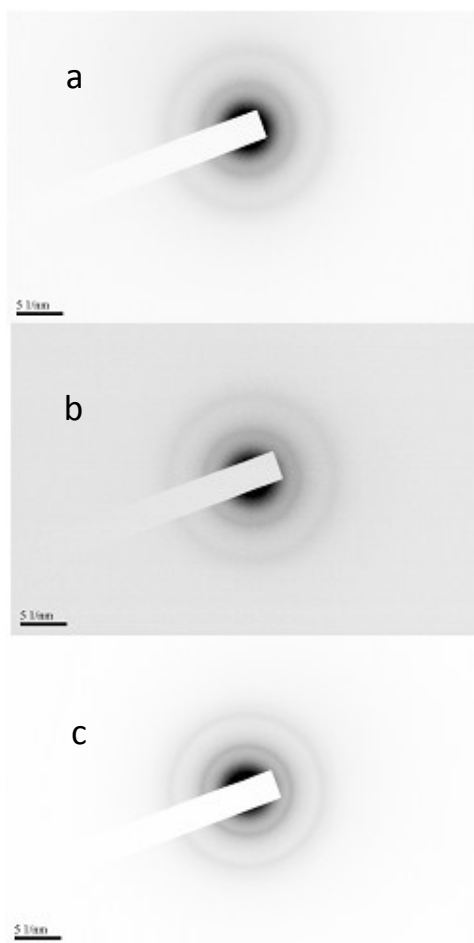

Figure S8 SAED images of NCFs obtained at (a) 750, (b) 900 and (c) 1000 °C in nitrogen atmosphere

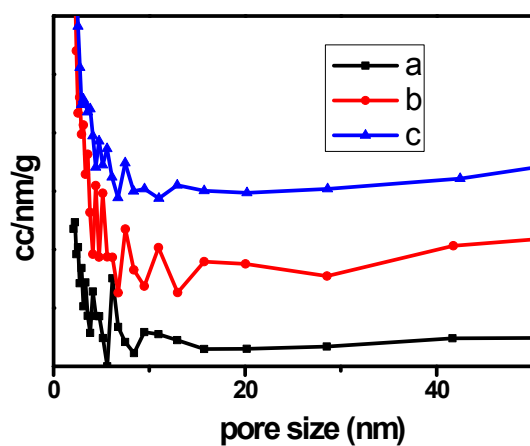

Figure S9 The pore size distribution curves for NCFs obtained at (a) 750, (b) 900 and (c) 1000 °C

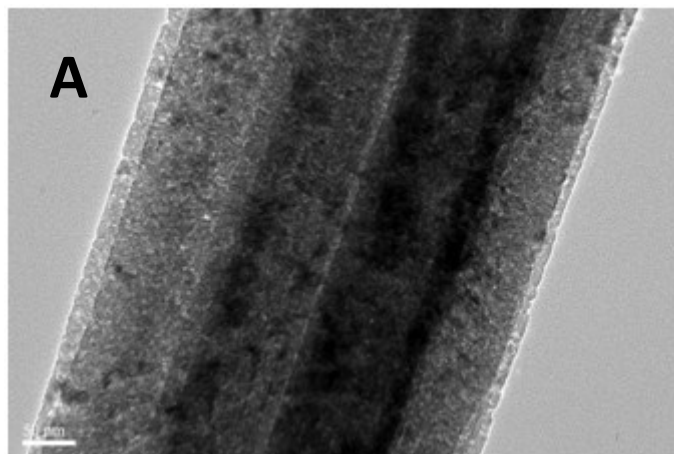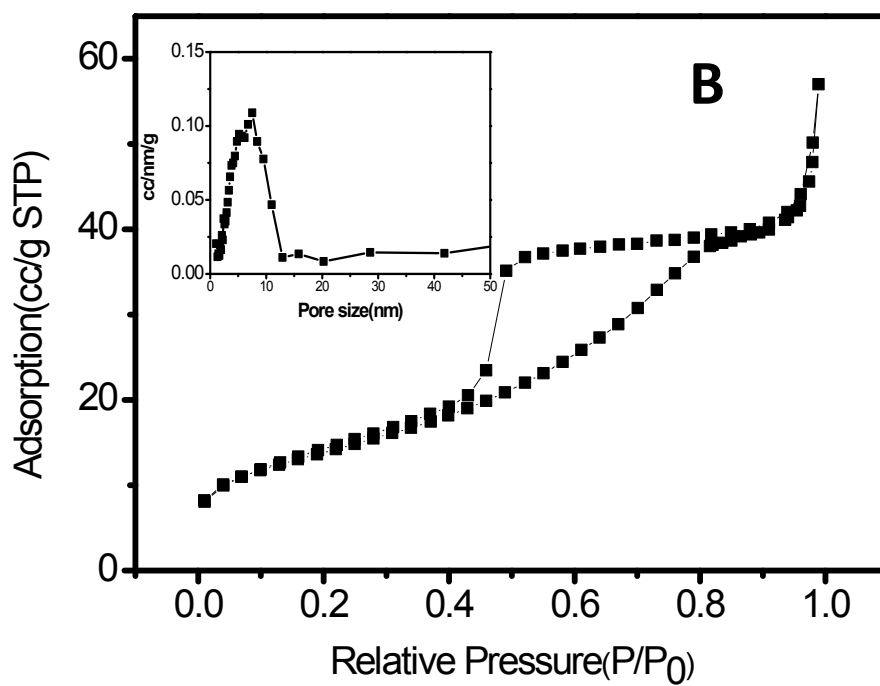

Figure S10 TEM (A) and N<sub>2</sub>-adsorption analysis (B) result for  $\gamma$ -Al<sub>2</sub>O<sub>3</sub> obtained by heating Al-DTPA at 800 °C in air



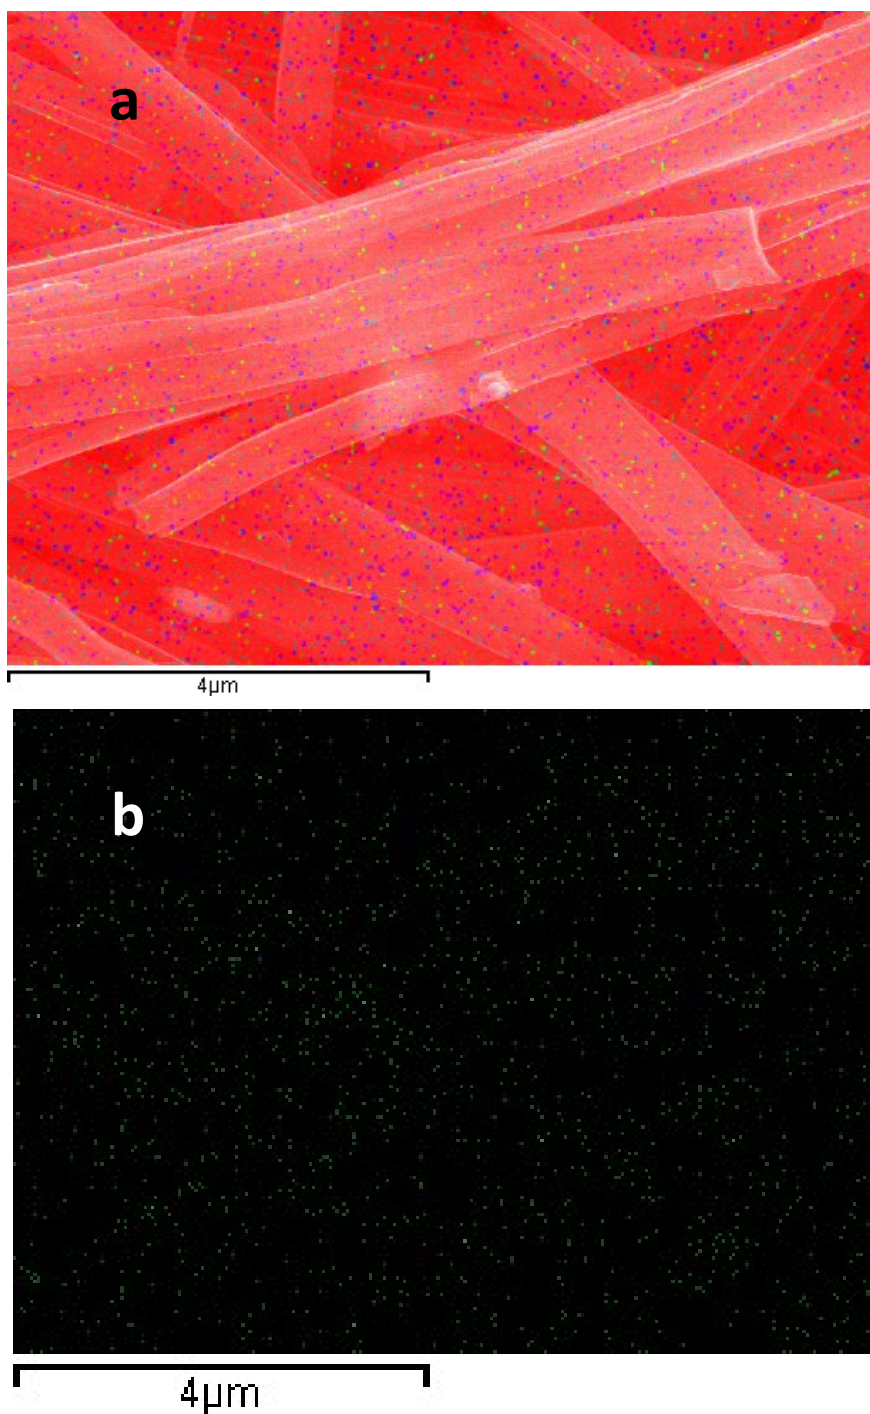

Figure S11 (a) SEM EDS element mapping images of NCF-900 for nitrogen, carbon and oxygen; (b) individual EDS element mapping image for nitrogen

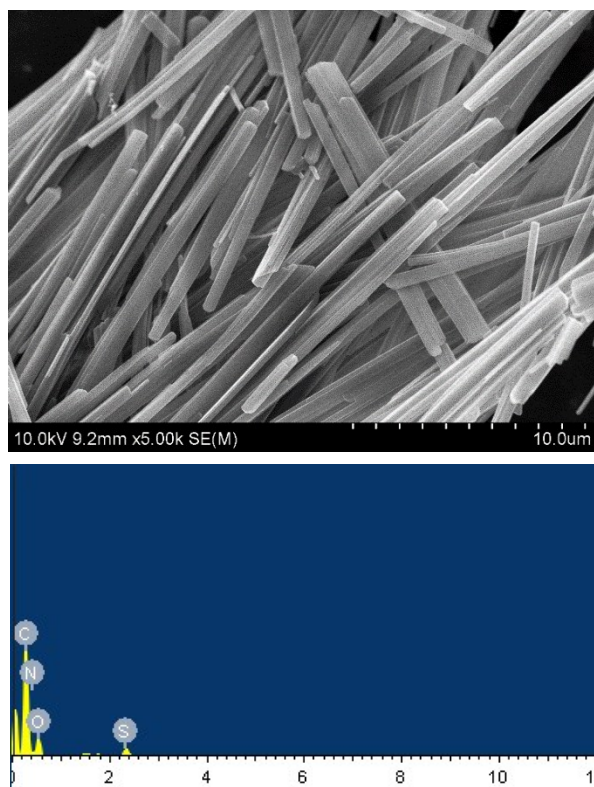

Figure S12 SEM and EDS spectrum of  $\text{SO}_3\text{H}/\text{NCF}-600$

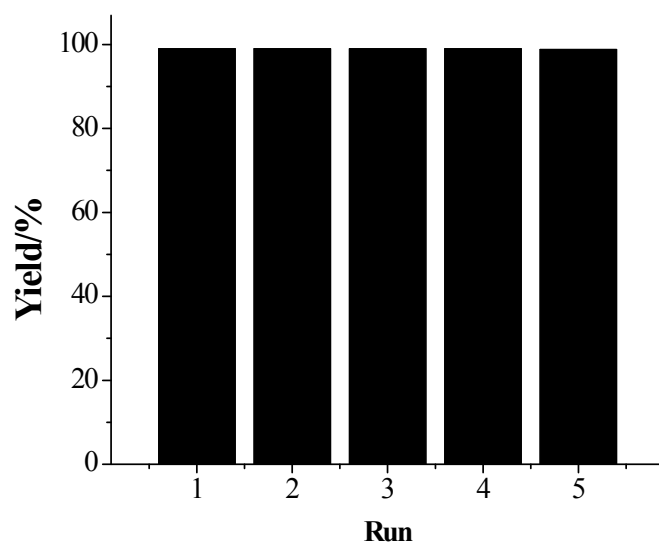

Fig.S13 The recycles of the  $\text{SO}_3\text{H}/\text{NCF}-600$  catalyst for the acetalization reaction of benzaldehyde with 1,2-ethanediol

Table S1 The surface species of N-doped carbon fibers and the content of deconvoluted N-type determined by XPS ( at %) and the nitrogen contents determined by elemental analysis ( wt %)

| Samples | C (at%) | N (at %) | N <sup>a</sup> (wt%) | Py-N <sup>+</sup> -O <sup>-</sup> (%) | Py-like (%) | G-like (%) | Pyr-N-H (%) |
|---------|---------|----------|----------------------|---------------------------------------|-------------|------------|-------------|
| 750     | 83.1    | 7.9      | 8.5                  | 9.7                                   | 50.8        | 11.1       | 28.4        |
| 900     | 83.7    | 6.7      | 7.0                  | 7.8                                   | 52.2        | 21.5       | 18.6        |
| 1000    | 84.0    | 3.6      | 3.9                  | 12.0                                  | 34.9        | 50.0       | 3.2         |

<sup>a</sup> determined by elemental analysis

Table S2 The surface species and nitrogen content of deconvoluted N-type determined by XPS for Al-DTPA -600 and SO<sub>3</sub>H/NCF-600

| Samples                   | C (at %) | N (at %) | Py-N <sup>+</sup> -O <sup>-</sup> (%) | Py-like (%) | G-like (%) | Pyr-N-H (%) |
|---------------------------|----------|----------|---------------------------------------|-------------|------------|-------------|
| Al-DTPA -600              | 51.08    | 4.84     | 10.1                                  | 51.3        | 10.4       | 28.2        |
| SO <sub>3</sub> H/NCF-600 | 68.40    | 11.03    | 12.6                                  | 21.6        | 25.8       | 40.0        |
